# Supplementary material for: A new class of heterogeneous Pd catalysts for synthetic organic chemistry
Source: Royal Society of Chemistry journal article supplement (doi:10.1039/c1cy00119a), 2011-01-01
Supplement: c1cy00119a.pdf [file c1cy00119a.pdf]

Supporting Information - Manuscript ID CY-COM-03-2011-000072 to *Catal. Sci. Technol.*  
(1-Apr-2011)

**Table 1.** X-ray Powder Diffraction (XRD) of SiliaCat Pd<sup>0</sup>-4

| Catalyst                    | Diffraction angle 2θ |       |       |       | Mean crystallite size (nm) |
|-----------------------------|----------------------|-------|-------|-------|----------------------------|
|                             | 111                  | 200   | 220   | 311   |                            |
| <sup>a</sup> Pd(0)          | 40.12                | 46.66 | 68.12 | 82.10 | N.A.                       |
| SiliaCat Pd <sup>0</sup> -4 | 39.96                | 46.66 | 68.11 | 81.90 | 5.7                        |

<sup>a</sup>The Powder Diffraction File of The International Centre for Diffraction Data is used to identified the diffractions peaks characteristic of crystalline Pd(0) with a face centered cubic (fcc) lattice identified Pd(0)

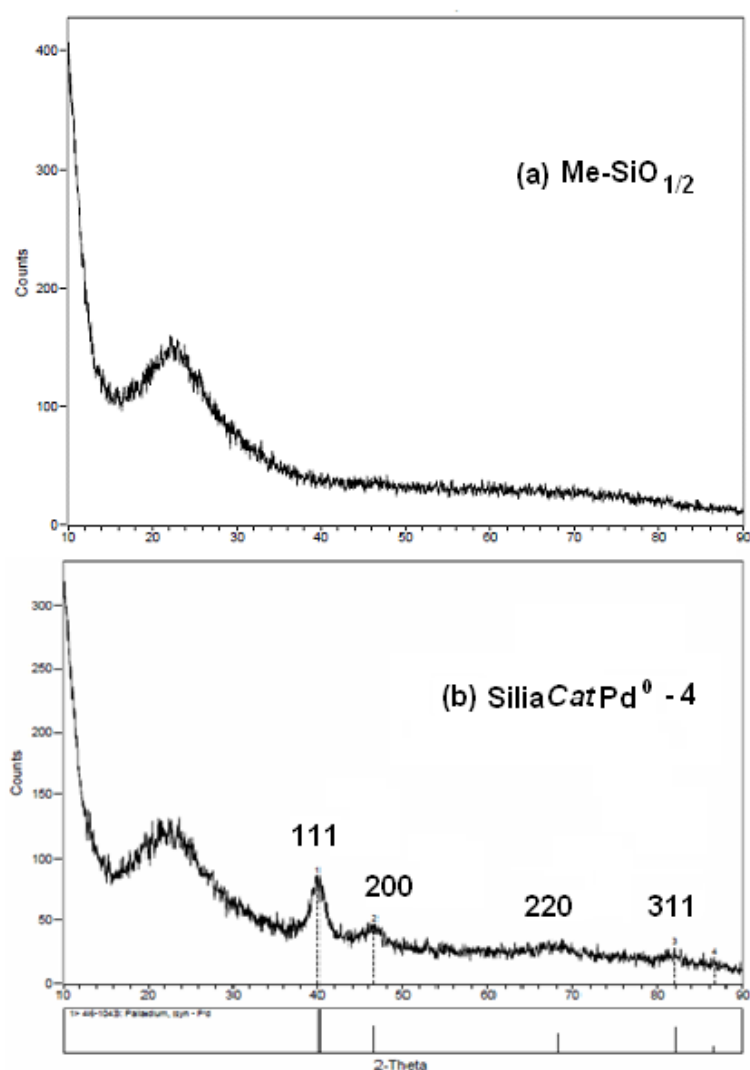

**Figure 1.** Powder X-ray diffraction (XRD) pattern of SiliaCat Pd<sup>0</sup>-4 catalyst
